# Supplementary figures and images for: Electrochemical discharge of nanocrystalline magnetite: structure analysis using X-ray diffraction and X-ray absorption spectroscopy
Source: Royal Society of Chemistry journal article supplement (doi:10.1039/c3cp52870g), 2013-01-01

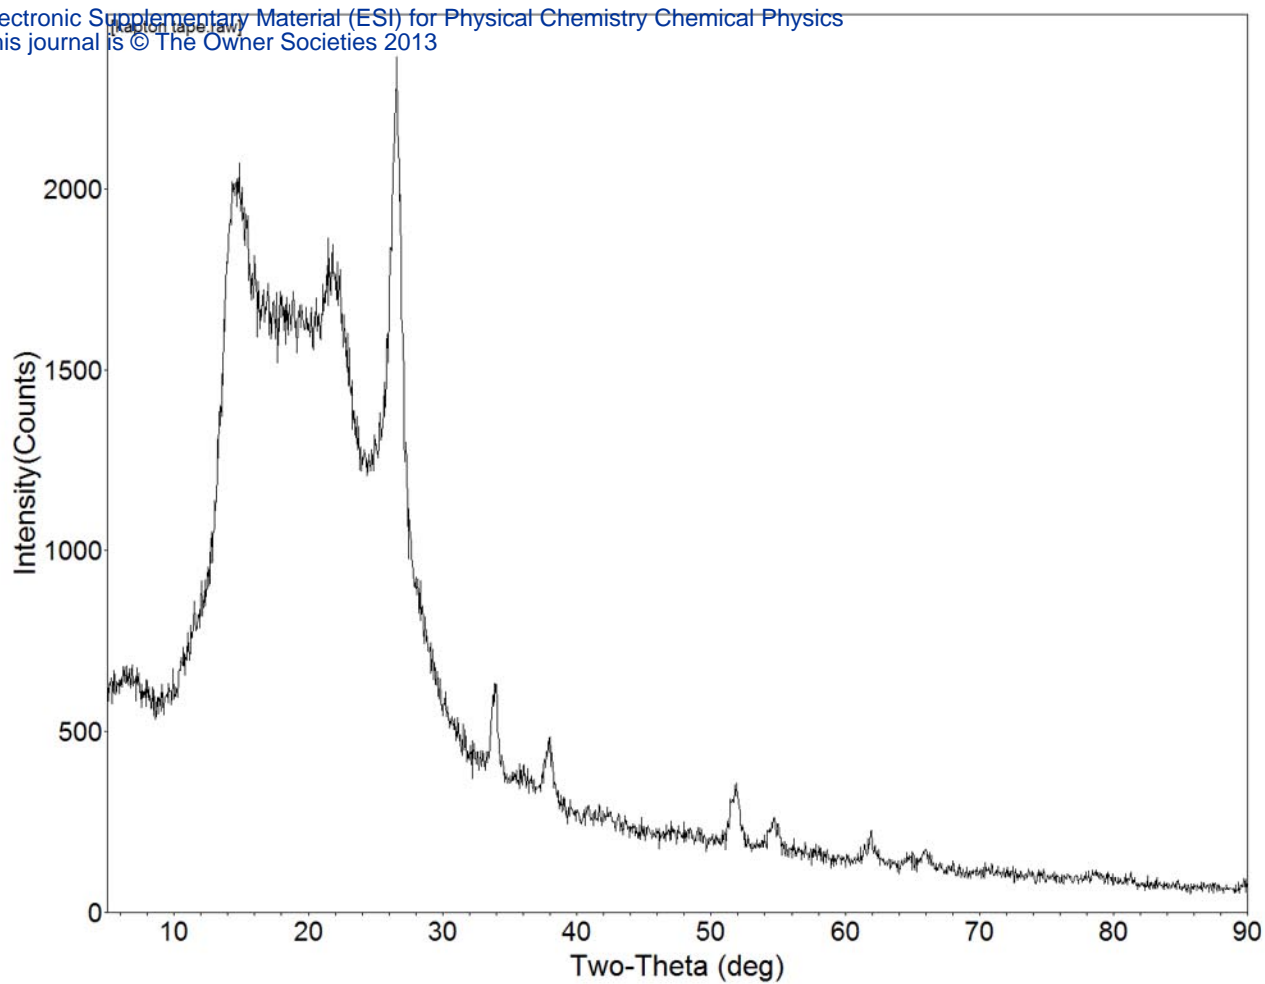

Supplement: c3cp52870g.pdf [file c3cp52870g.pdf]
